# Supplementary material for: Bone morphogenetic protein signaling is required for RAD51-mediated maintenance of genome integrity in vascular endothelial cells
Source: PubMed Central journal article supplement (PMC6155317; doi:10.1038/s42003-018-0152-1), 2018-09-24
Supplement: 42003_2018_152_MOESM1_ESM.pdf [file 42003_2018_152_MOESM1_ESM.pdf]

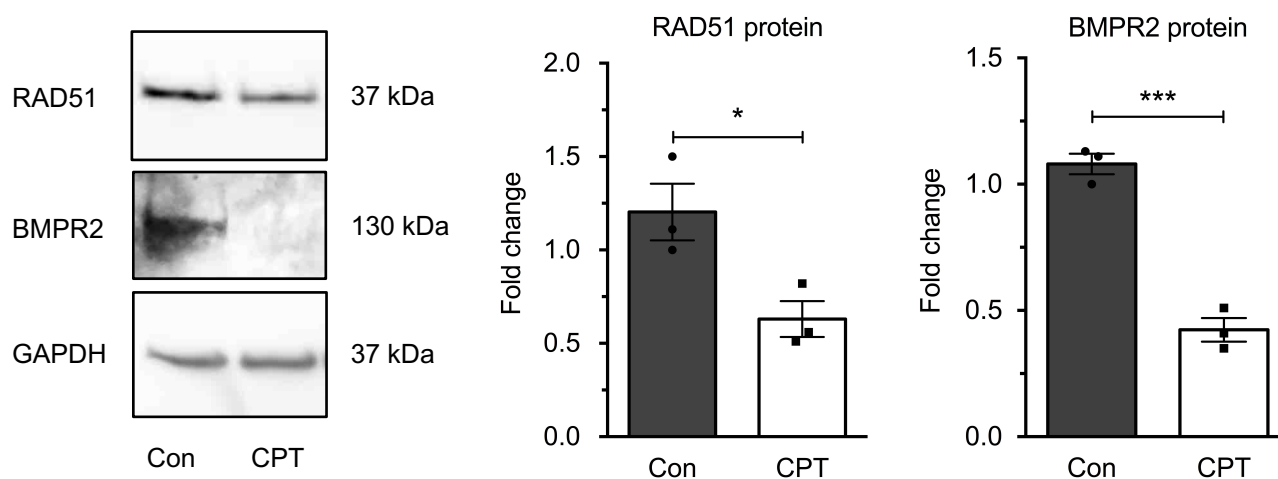

**Supplementary Fig. 1. BMPR2 and RAD51 are decreased upon treatment with DNA damage agent Camptothecin.** PMVECs were treated with camptothecin (CPT; 4  $\mu$ M) or vehicle (Con, DMSO) for 6h, followed by immunoblot analysis of RAD51, BMPR2, and GAPDH (loading control). Representative image and the quantitation of three independent blots are shown (n=3). Bars represent mean  $\pm$ SEM from three different experiments per condition. \* $P$ <0.05 and \*\*\* $P$ <0.01 versus respective control. Unpaired two-tail  $t$ -test was used.

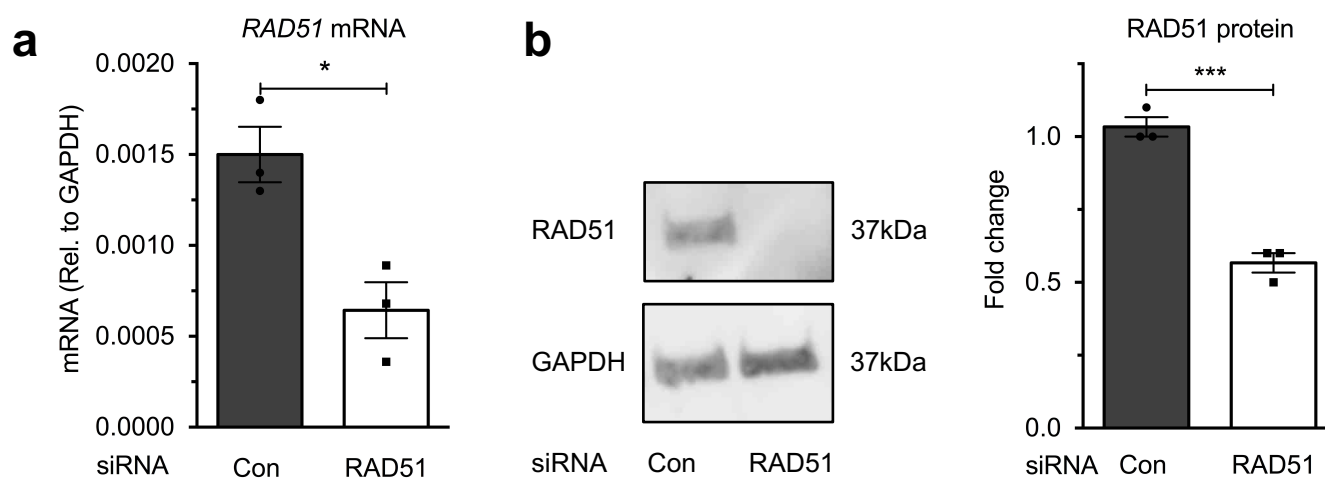

**Supplementary Fig. 2. *RAD51* mRNA and protein are efficiently depleted in PMVECs upon siRNA transfection.** PMVECs were transfected with control (Con) or *RAD51* siRNAs, followed by qRT-PCR analysis of *RAD51* mRNA (**a**) and immunoblot analysis of *RAD51*, and GAPDH (loading control) (**b**). Representative image and the quantitation of three independent blots are shown. Bars represent  $\pm$ SEM from three different experiments per condition (n=3). \* $P < 0.05$  and \*\*\* $P < 0.001$  versus respective control. Unpaired two-tail *t*-test was used.

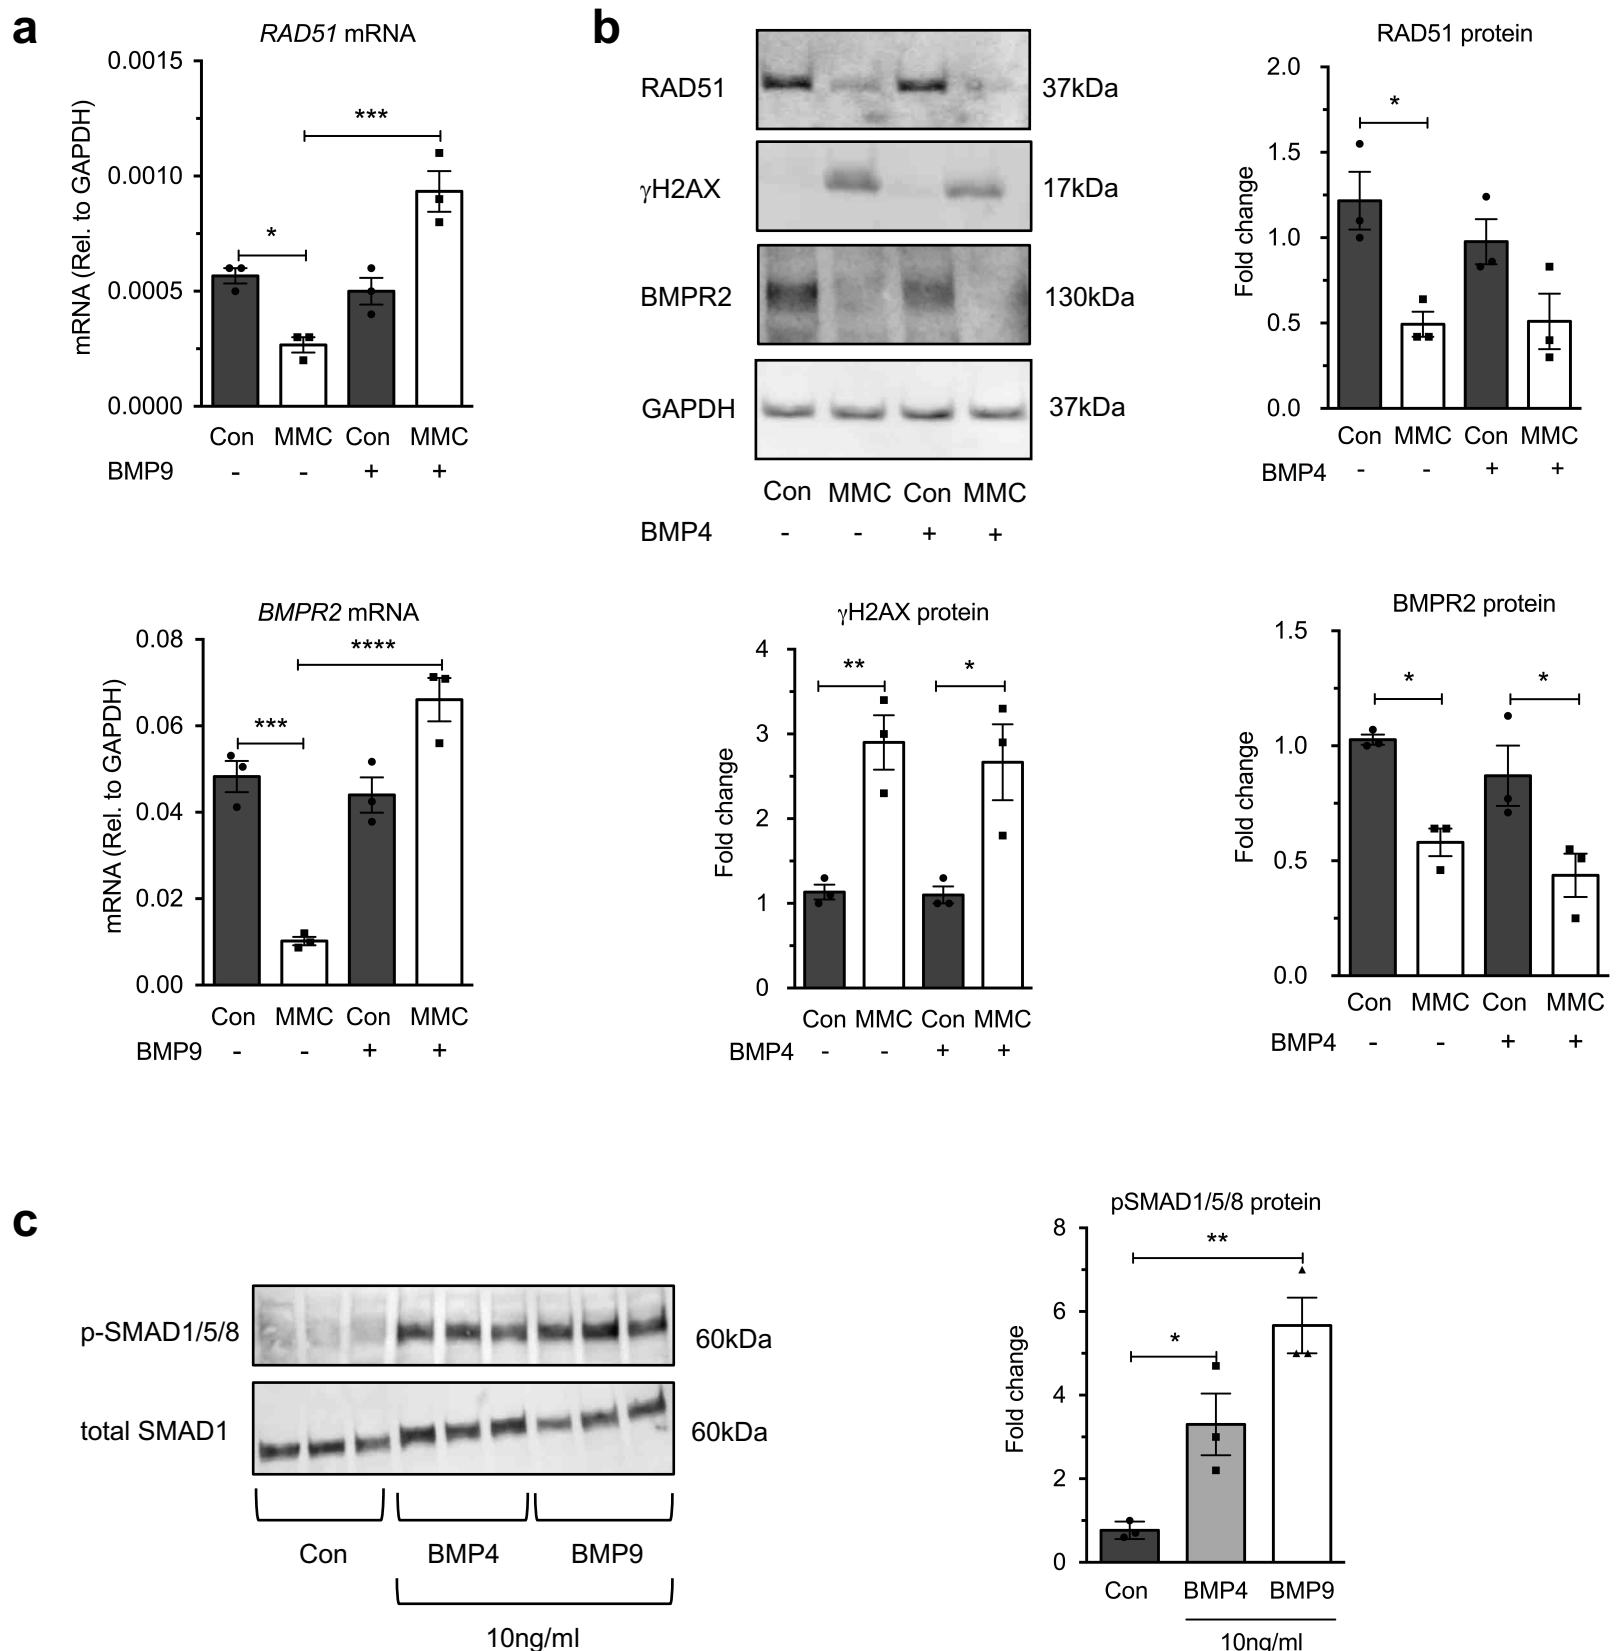

**Supplementary Fig. 3. Unlike BMP9, BMP4 stimulation of PMVECs does not rescue the attenuation of RAD51 by Mitomycin C (MMC) treatment.** **a.** PMVECs were treated with vehicle (Con, H<sub>2</sub>O) or MMC (50  $\mu$ g/ml) with or without BMP9 (10 ng/ml) for 14hr. *BMPR2* and *RAD51* mRNA was measured by qPCR (n=3). Normalization was done against *GAPDH* expression. **b.** PMVECs were treated with vehicle (Con, H<sub>2</sub>O) or MMC (50  $\mu$ g/ml) with or without BMP4 (10 ng/ml) for 14hr. *RAD51* and *BMPR2* protein relative to *GAPDH* were examined by immunoblot (n=3). Representative image and the quantitation are shown.  $\gamma$ H2AX was studied to measure the amount of double strand breaks (DSB). **c.** PMVECs were treated with or without 10 ng/ml BMP4 or BMP9 for 14 hr, followed by immunoblot analysis of phospho-SMAD1/5/8 (p-SMAD1/5/8) and total SMAD1 in triplicates. Bars represent  $\pm$ SEM from three different experiments per condition (n=3). \* $P$ <0.05, \*\* $P$ <0.01, \*\*\* $P$ <0.001, \*\*\*\* $P$ <0.0001 versus respective control. One-way ANOVA followed by Tukey's multiple comparisons test was used.

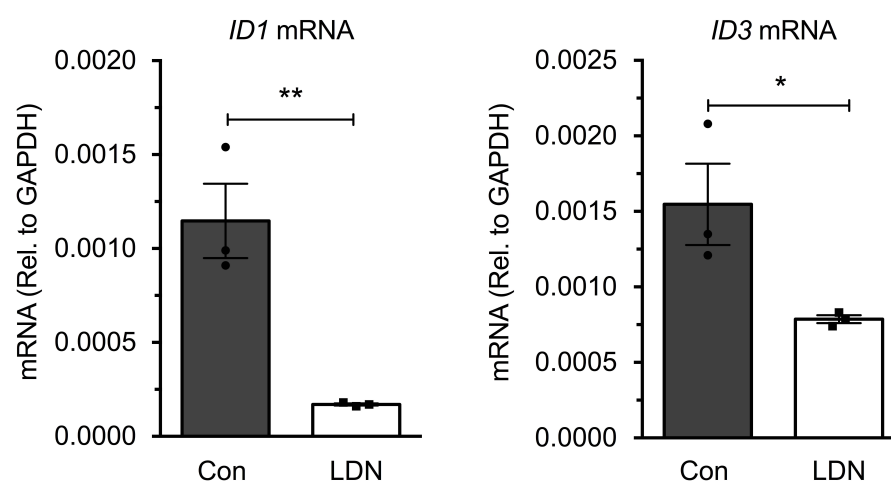

**Supplementary Fig. 4. Treatment with the type I BMP receptor kinase inhibitor LDN193189 effectively blocks BMP9-BMP2-mediated gene regulation.** PMVECs were treated with vehicle (Con, DMSO) or LDN193189 (LDN; 100nM) for 72 hr, followed by qRT-PCR analysis of *ID1* and *ID3* mRNA relative to *GAPDH* expression. *ID1* and *ID3* are transcriptionally activated upon BMP stimulation via the BMP2-SMAD axis. Bars represent  $\pm$ SEM from three different experiments per condition (n=3). \* $P$ <0.05 and \*\* $P$ <0.01 versus respective control. Unpaired two-tail  $t$ -test was used.

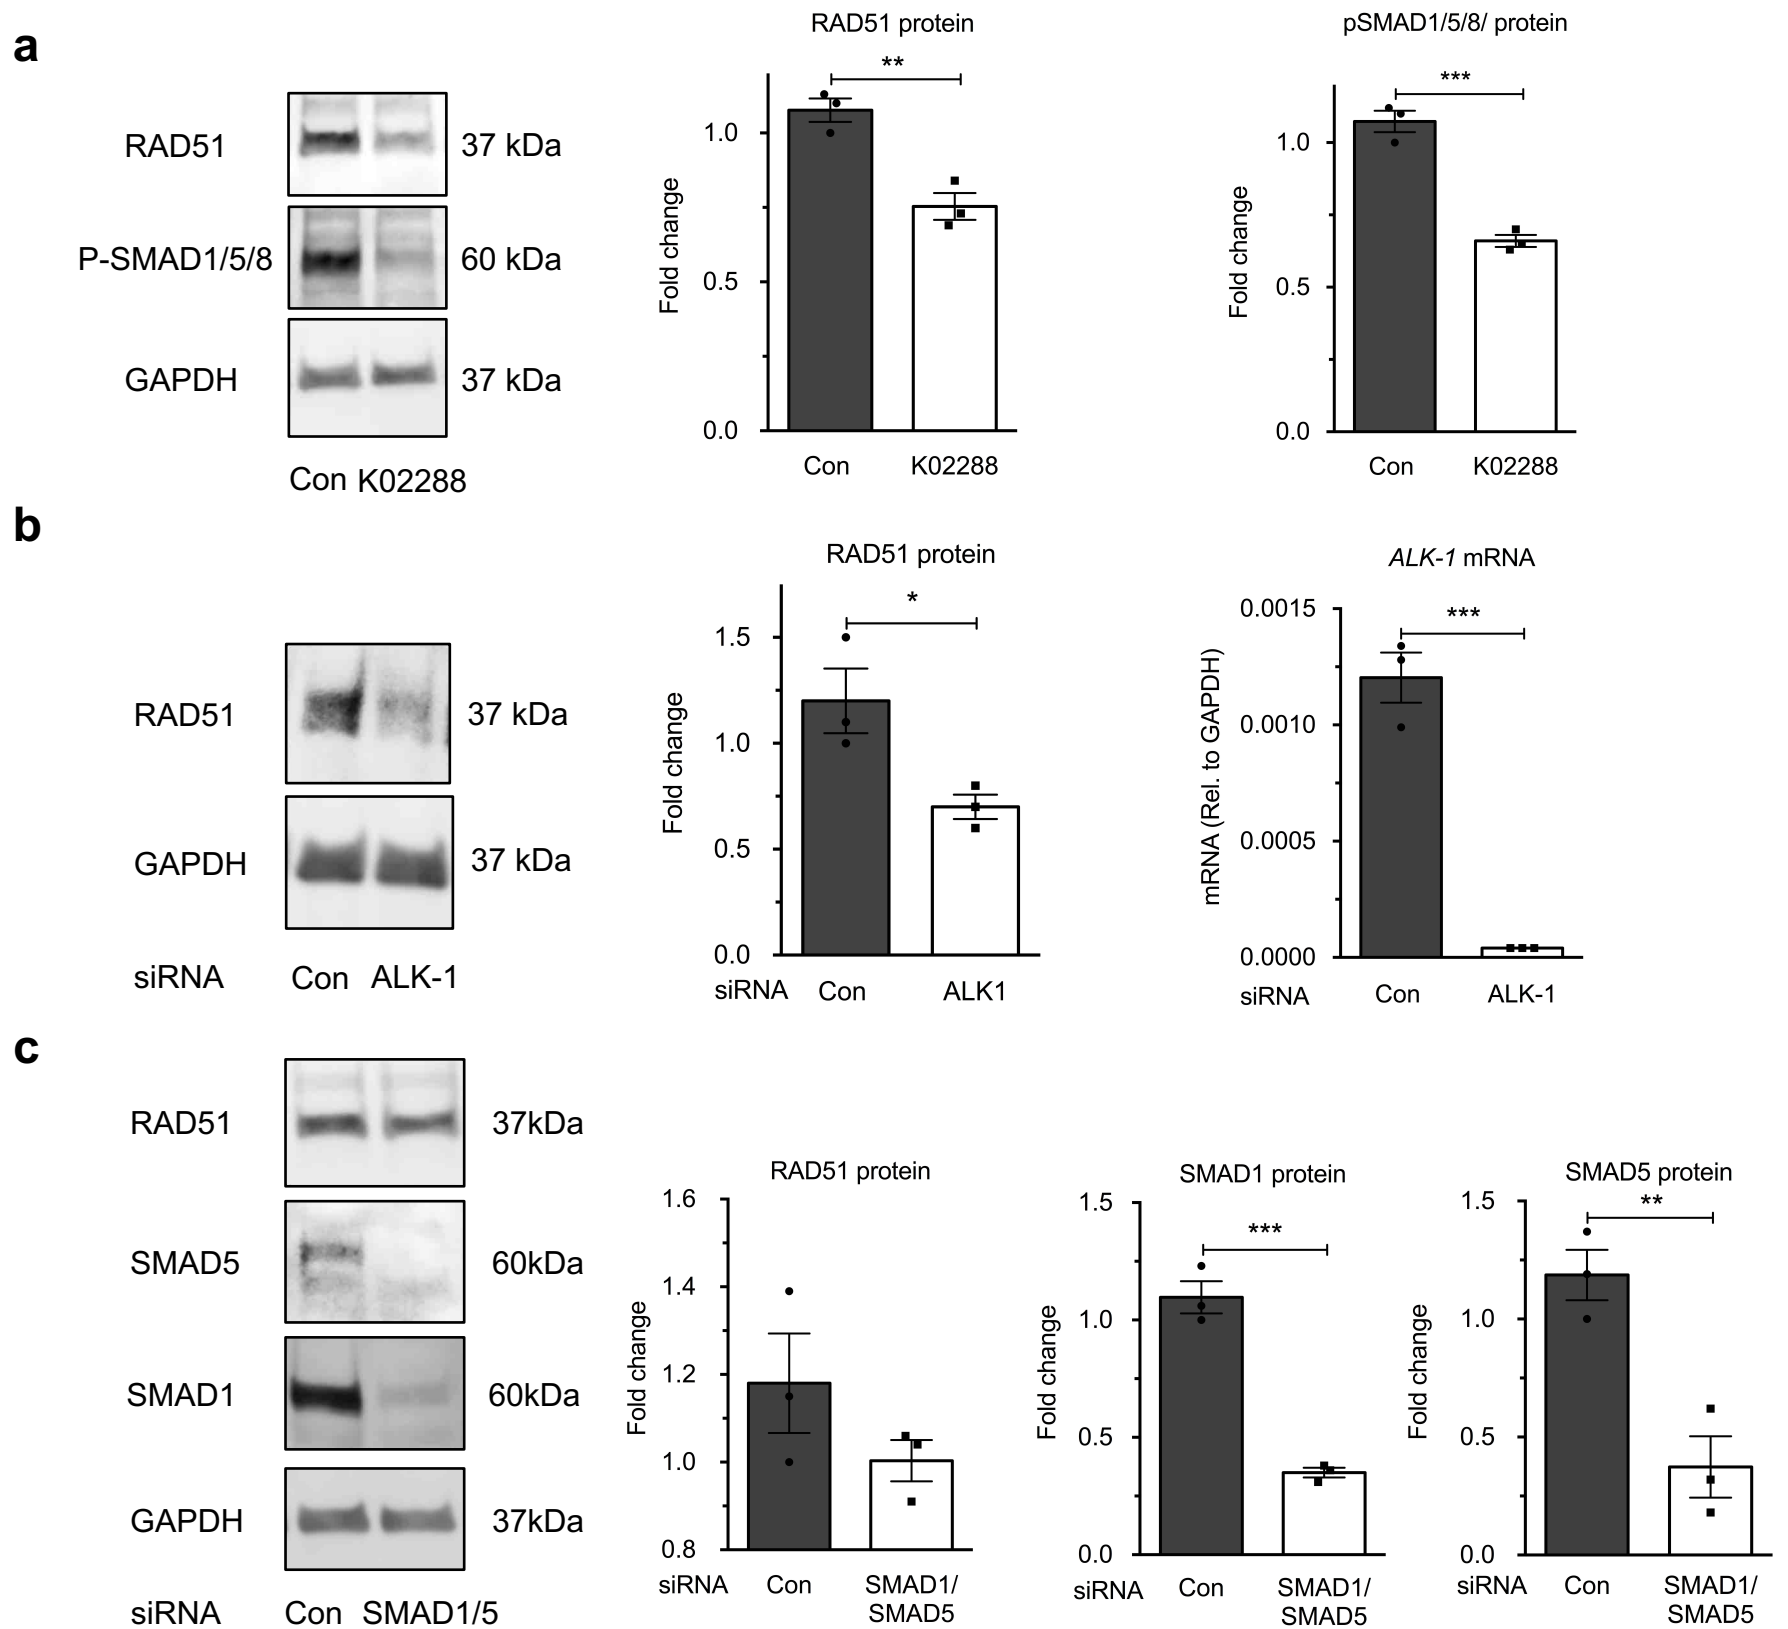

**Supplementary Fig. 5. Perturbation of ALK-1 and SMAD1/5 result in RAD51 depletion.** **a.** PMVECs were treated with vehicle (Con, DMSO) or ALK-1/2 inhibitor K02288 (1  $\mu$ M) for 72 hr, followed by immunoblot analysis of RAD51, phospho-SMAD1/5/8, and GAPDH (loading control). The quantitation of three independent blots (n=3) are shown. **b.** PMVECs were transfected with control (Con) or ALK-1 siRNAs and RAD51 protein amount relative to GAPDH was examined by immunoblot 72 hr after transfections (n=3). The amount of *ALK-1* mRNA relative to *GAPDH* mRNA was determined by qRT-PCR analysis. **c.** PMVECs were transfected with control (Con) or a mixture of siRNAs against SMAD1 and SMAD5. RAD51 protein amount relative to GAPDH was examined by immunoblot 72 hr after transfections (n=3). Bars represent  $\pm$ SEM from three different experiments per condition. \* $P$ <0.05, \*\* $P$ <0.01, and \*\*\* $P$ <0.001 versus respective control. Unpaired two-tail  $t$ -test was used.

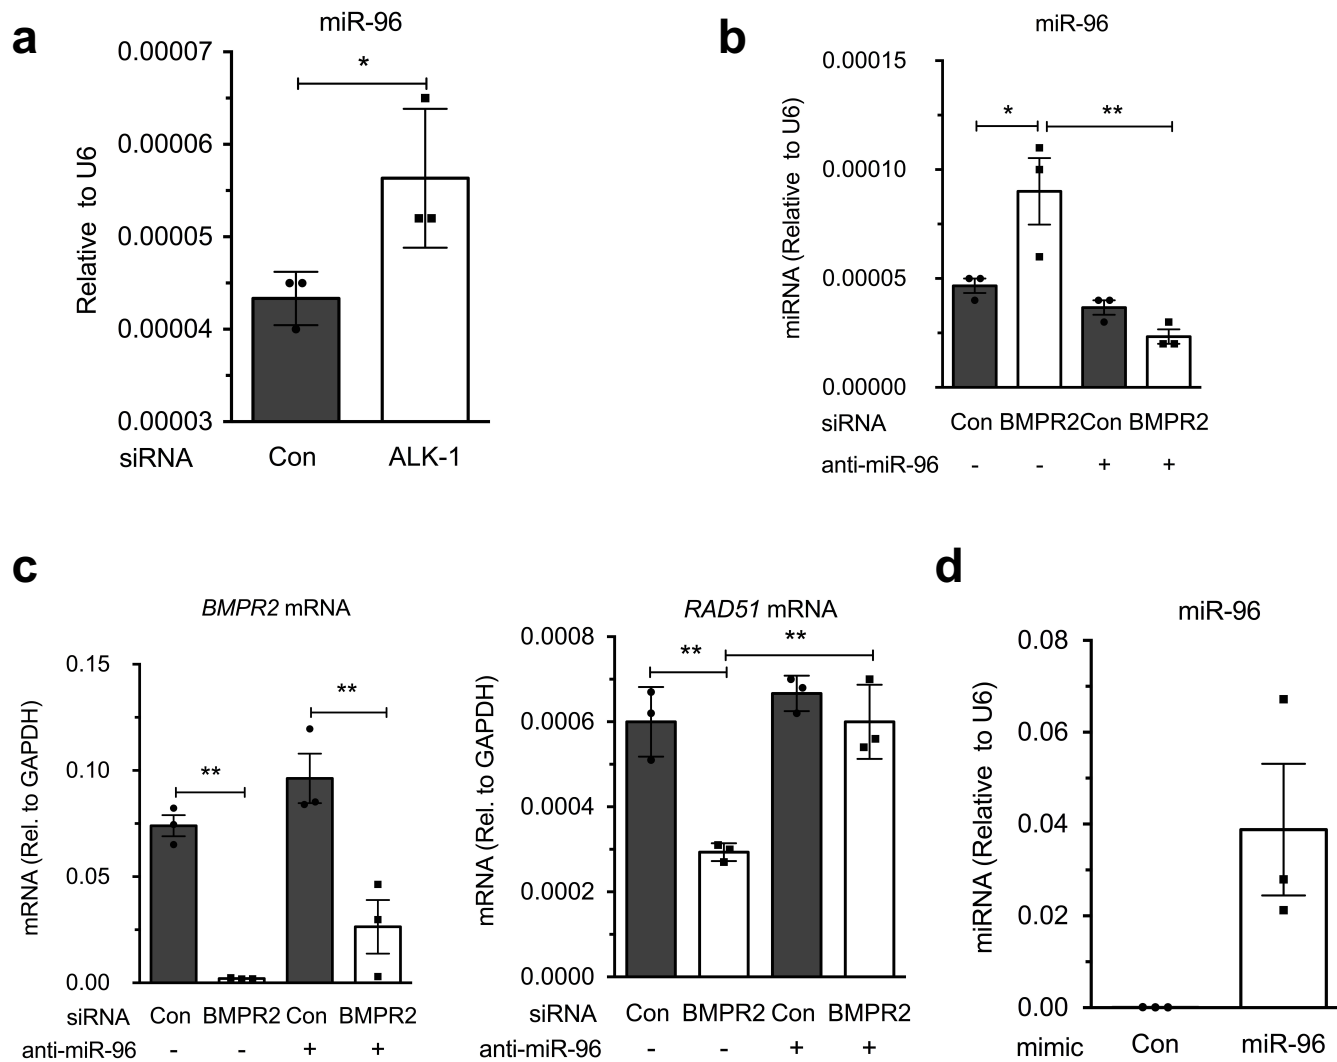

**Supplementary Fig. 6. Upregulation of miR-96 expression in PMVECs leads to reduction of RAD51 expression.** PMVECs were transfected with control (Con) or ALK-1 siRNAs and miR-96 expression was measured 72h after transfection initiations. Normalization was done against U6 snRNA expression. **a**. PMVECs were co-transfected with control (Con) or BMPR2 siRNAs with anti-Con miRNAs or anti-miR-96 and **b**. miR-96 expression and **c**. *BMPR2* and *RAD51* mRNA expression was measured 48 hr after transfection initiations (n=3). Normalization was done against U6 snRNA and *GAPDH* mRNA expression. **d**. PMVECs were overexpressed with miR-control (Con) or miR-96 mimics and miR-96 expression was measured 48 hr after transfection initiations (n=3). Normalization was done against U6 snRNA expression. Bars represents  $\pm$ SEM from three different experiments per condition. \* $P < 0.05$  and \*\* $P < 0.01$  versus respective control. Unpaired two-tail *t*-test was used in **a** and **d**. One-way ANOVA followed by Tukey's multiple comparisons test in **b** and **c** was used.

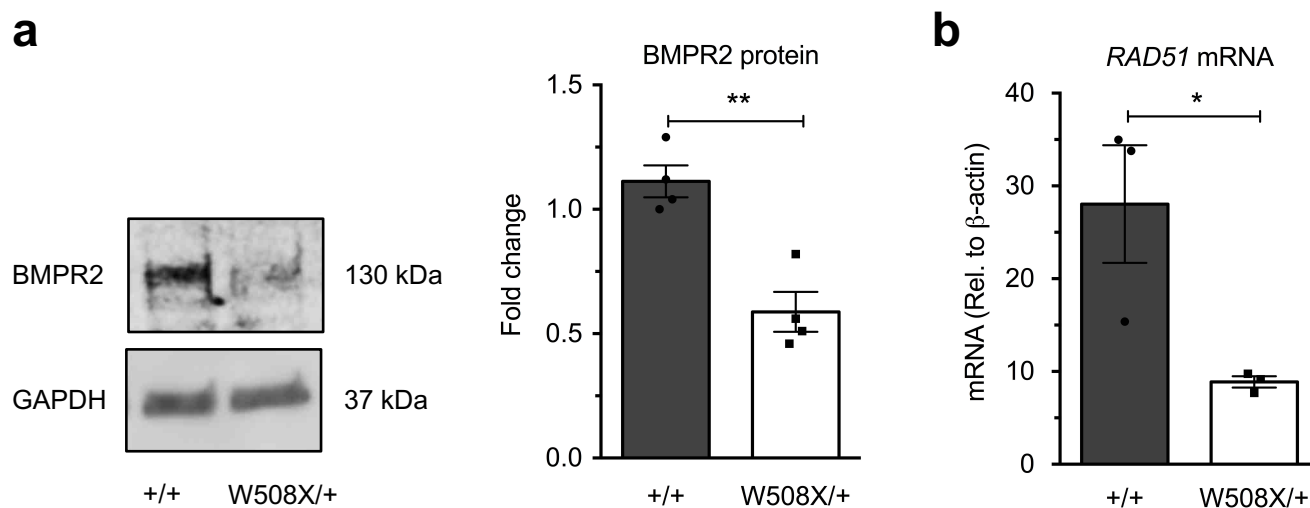

**Supplementary Fig. 7. Pulmonary arterial smooth muscle cells (PASMC) isolated from rats with the heterozygous *BMPR2* mutation W508X, leading to reduced BMPR2 amount, show reduced RAD51 expression. a.** BMPR2 protein amount and **b.** *RAD51* mRNA expression in wild type (+/+) or W508X/+ rats. Normalization was done against GAPDH expression. Bars represents  $\pm$ SEM from four different experiments per condition (n=4) in **a** and three different experiments per condition (n=3) in **b**. \* $P < 0.05$  and \*\* $P < 0.01$  versus respective control. Unpaired two-tail *t*-test was used.

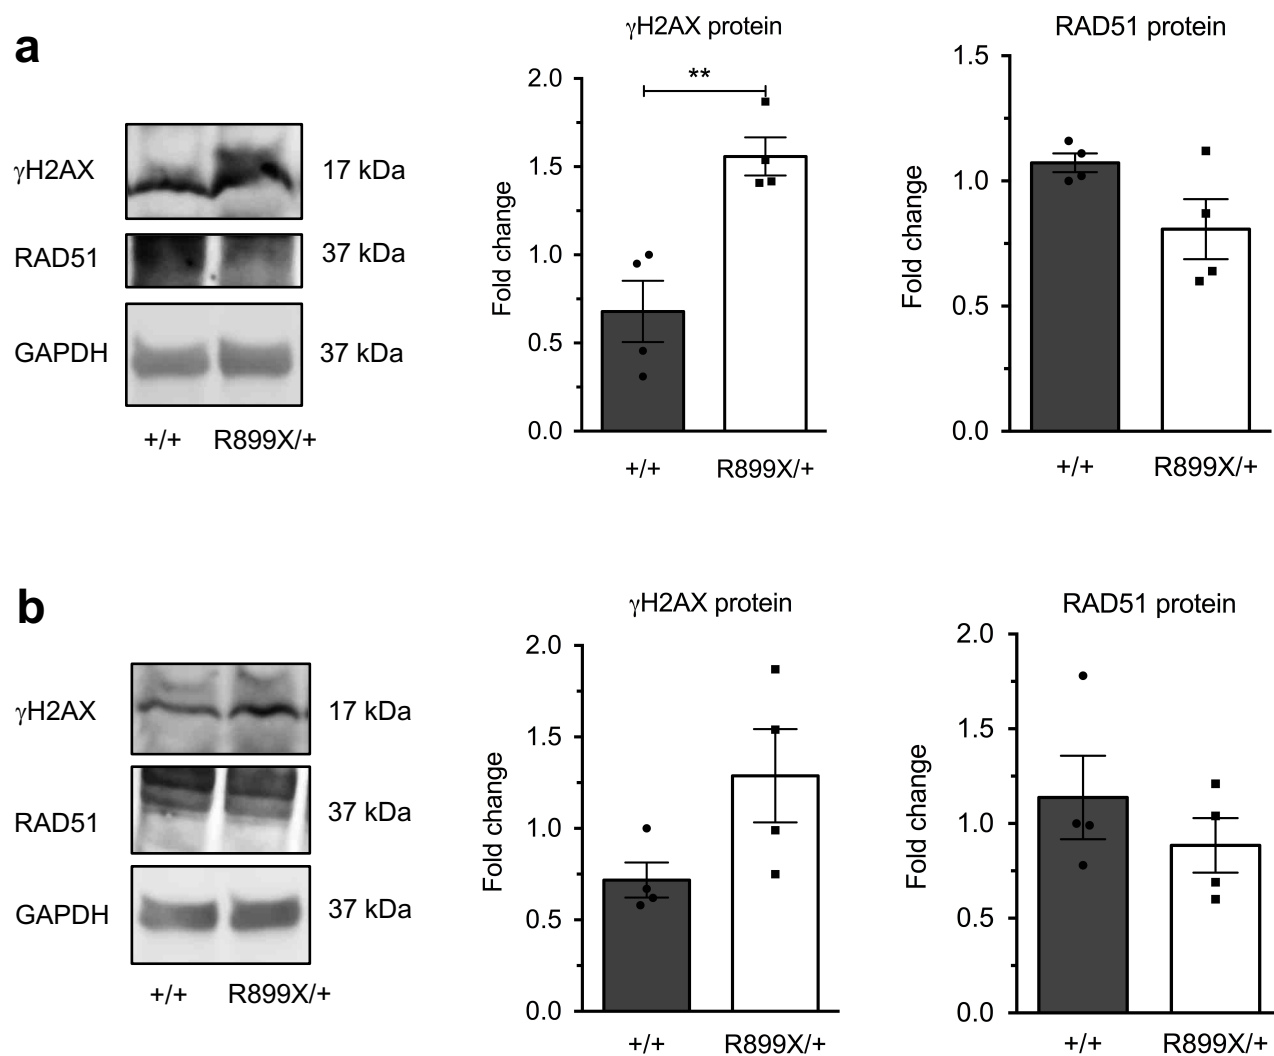

**Supplementary Fig. 8. Tissue-specific regulation of RAD51 by BMPR2.** The amount of  $\gamma$ H2AX, RAD51, and GAPDH (loading control) was examined by immunoblotting using total cell lysates of the liver (**a**) and the right ventricle (**b**) from control [BMPR2(+/+)] and heterozygous *BMPR2* mutant (*R899X/+*) mice. Bars represent  $\pm$ SEM from four different experiments per condition (n=4) in **a** and **b**. Unpaired two-tail *t*-test was used.



**Figure 1B**

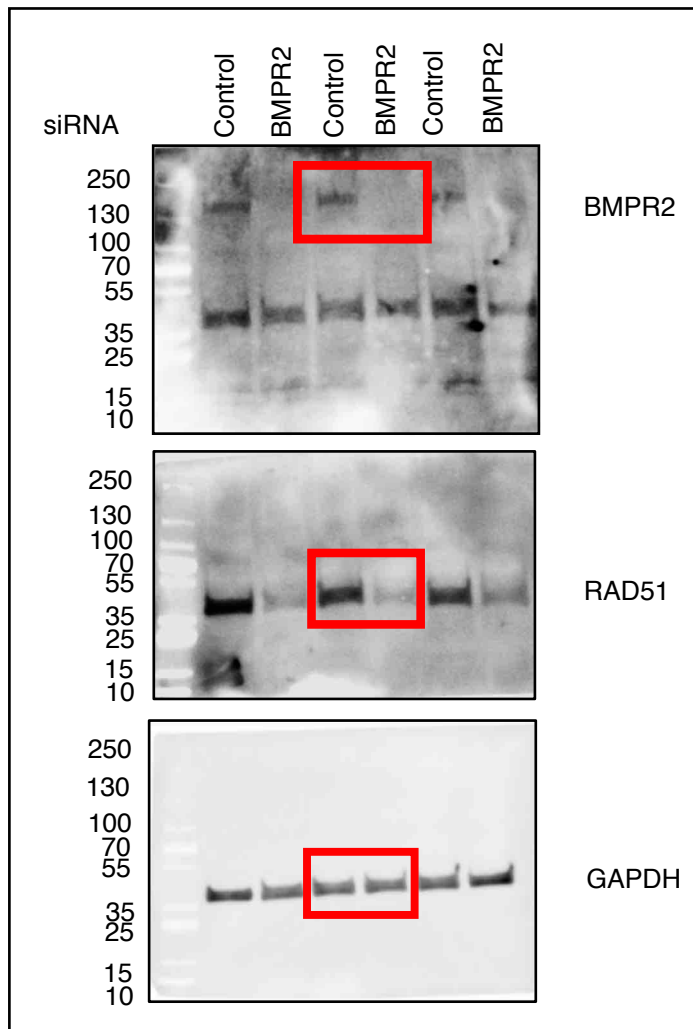

**Figure 1D**

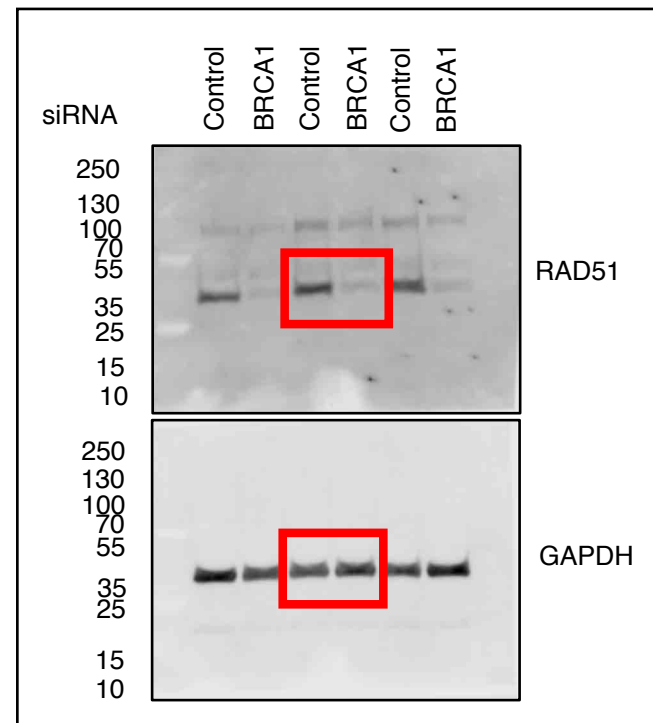

**Figure 1F**

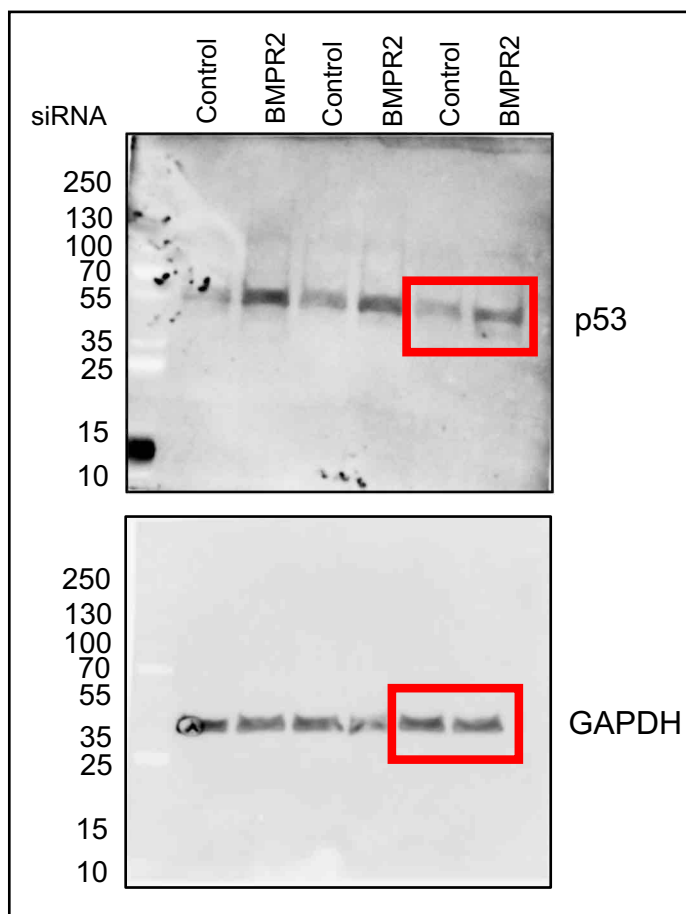

**Supplementary Fig. 9. Original immunoblots for Fig. 1.**

**Figure 2B**

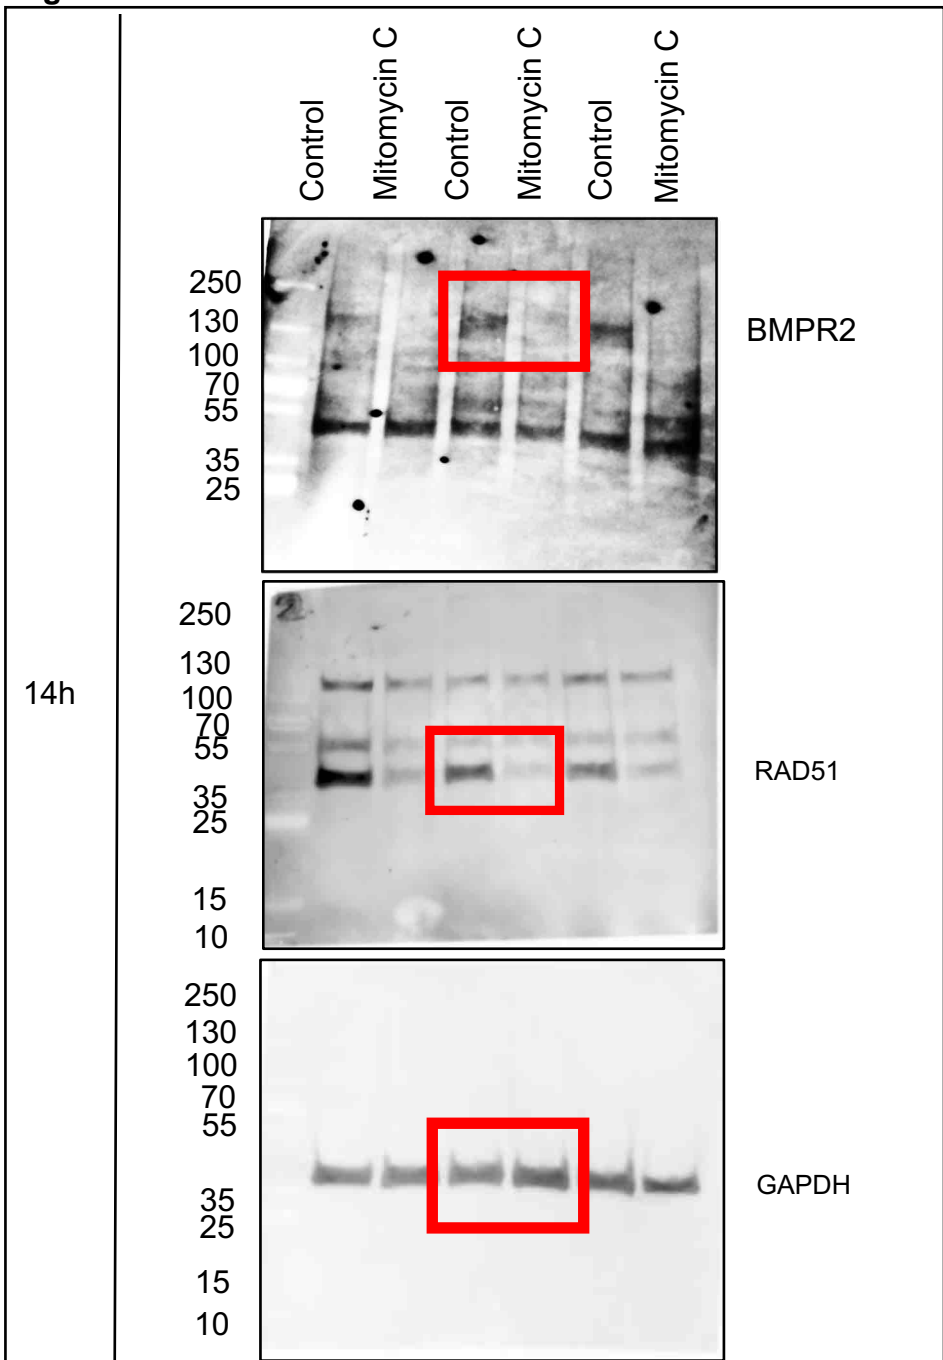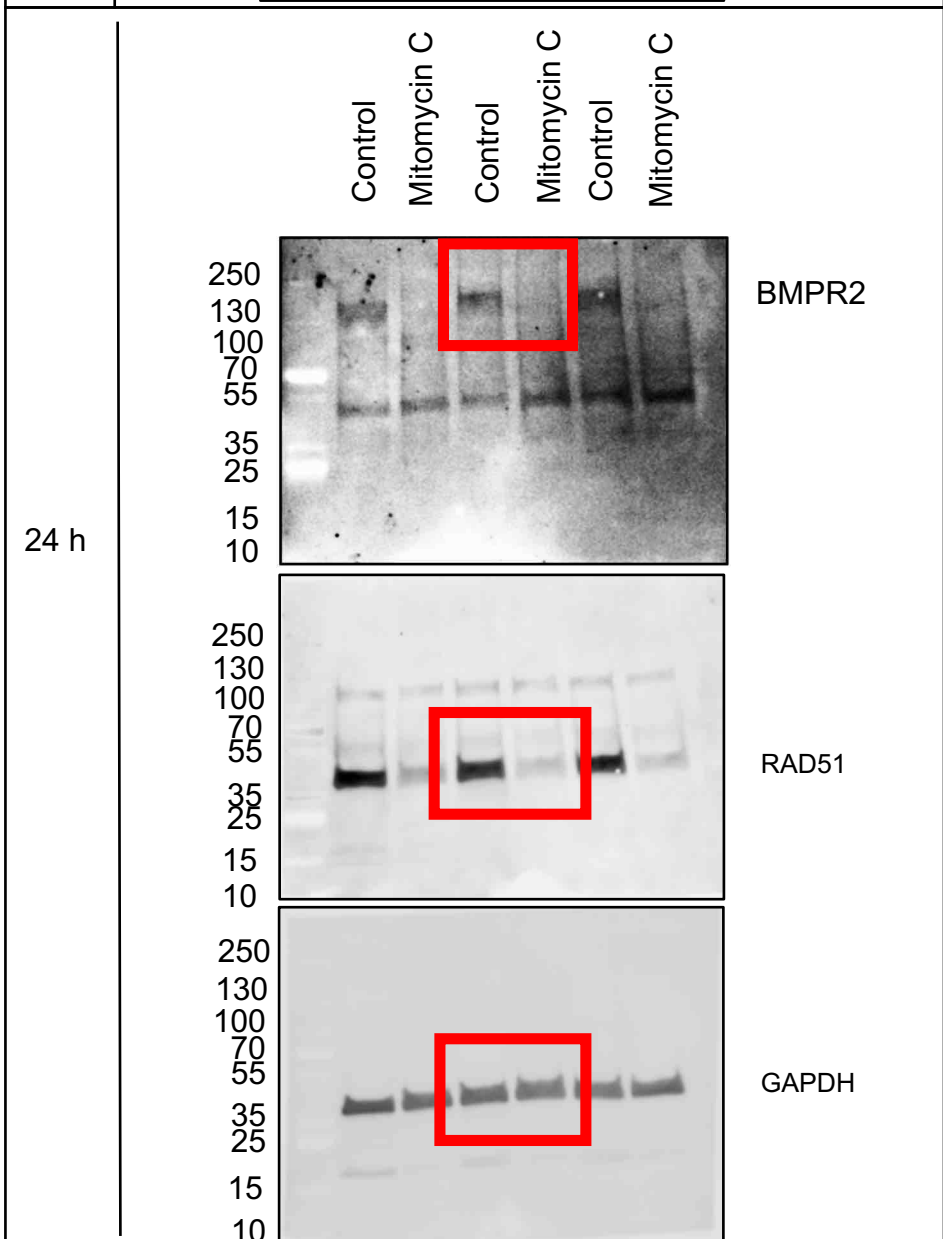

**Figure 2C**

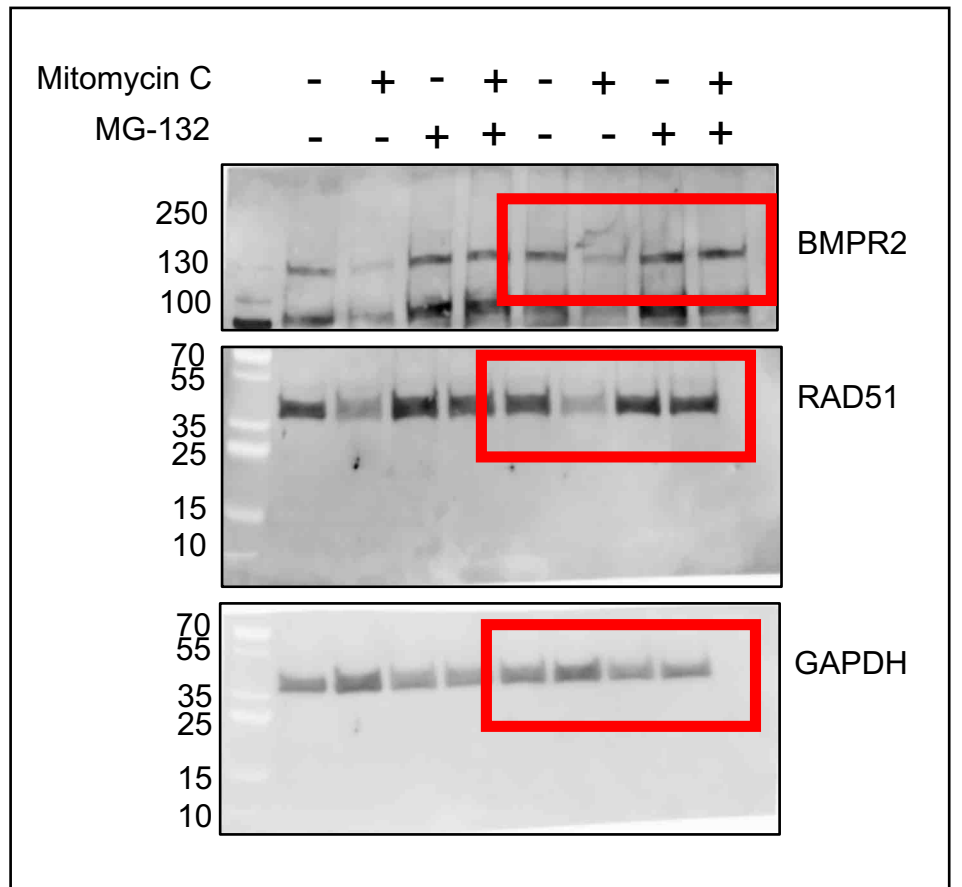

**Supplementary Fig. 10. Original immunoblots for Fig. 2.**

**Figure 3A**

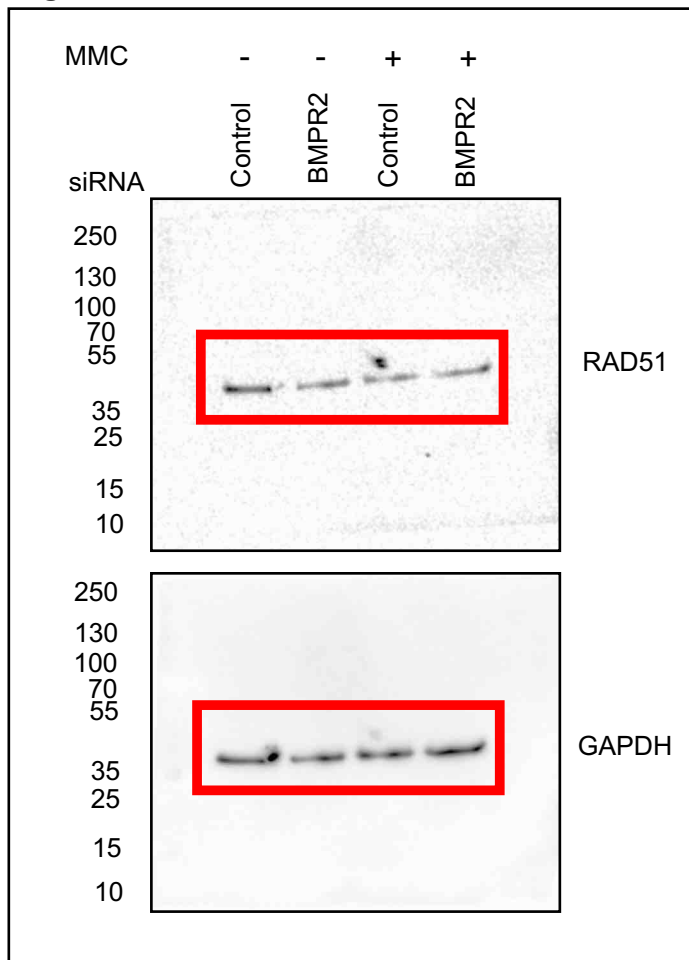

**Figure 3E**

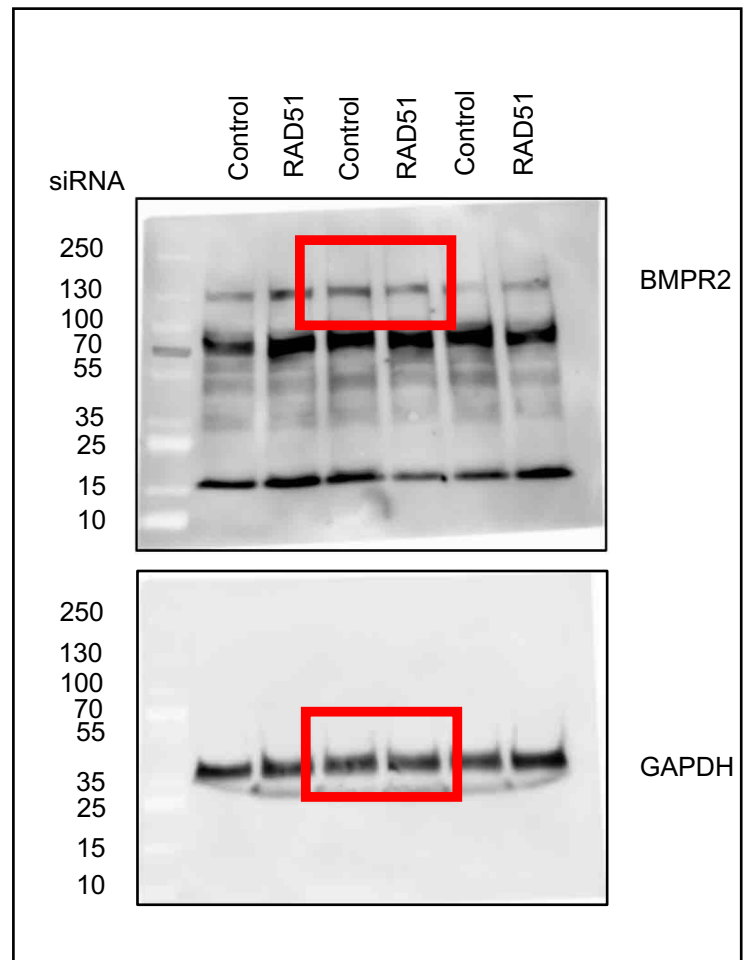

**Supplementary Fig. 11. Original immunoblots for Fig. 3.**

**Figure 4A**

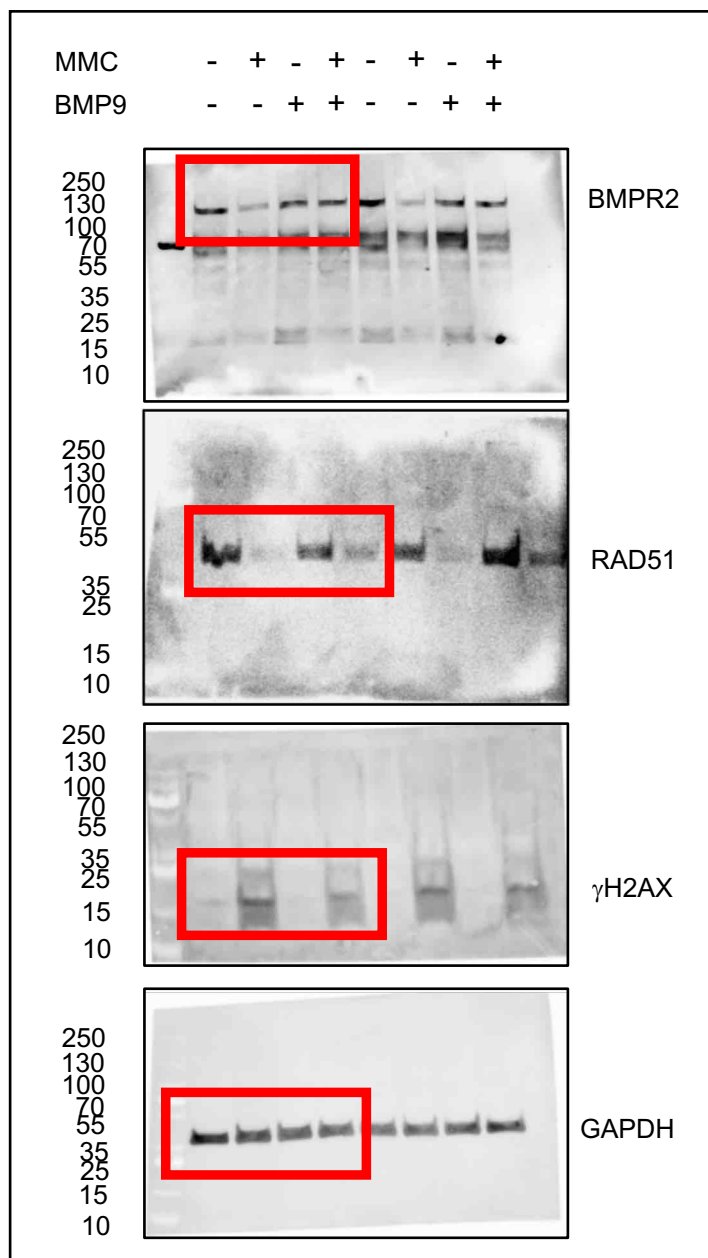

**Figure 4B**

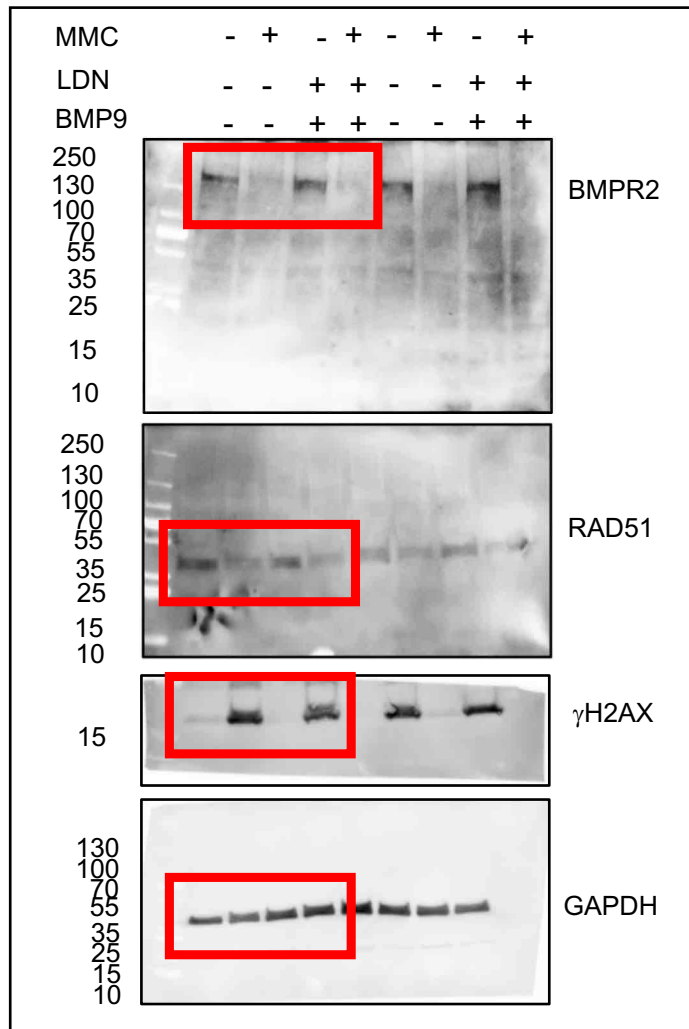

**Figure 4C**

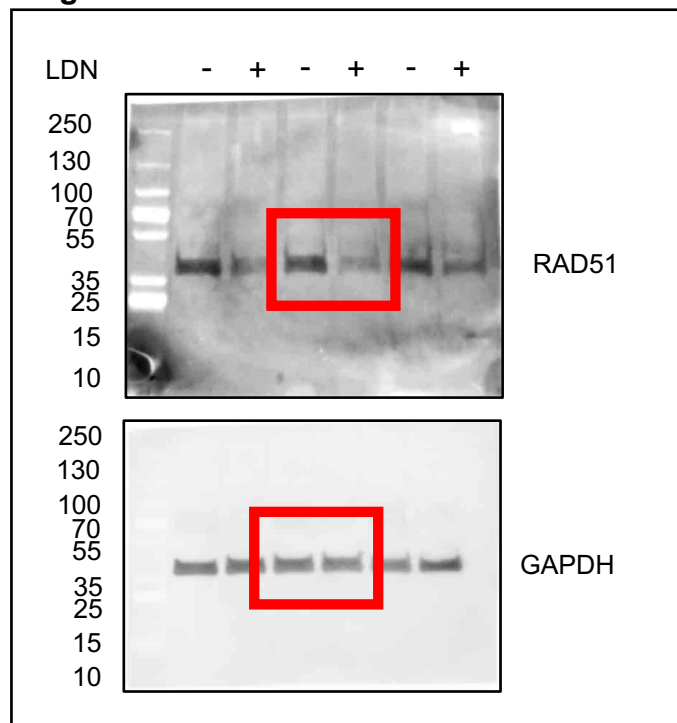

**Supplementary Fig. 12. Original immunoblots for Fig. 4.**

**Figure 5C**

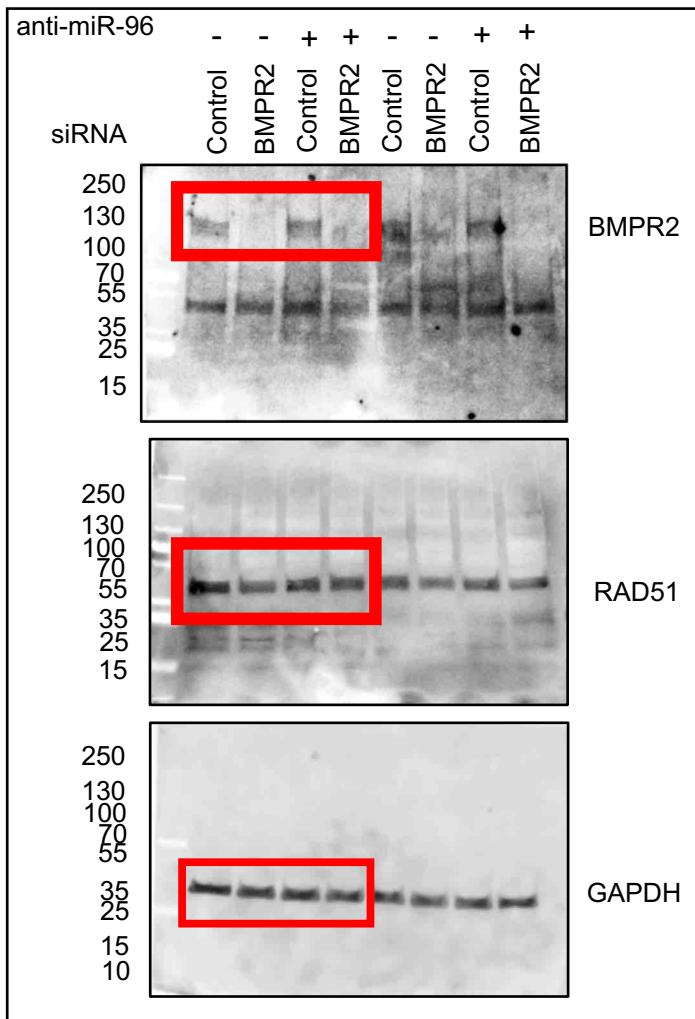

**Figure 5D**

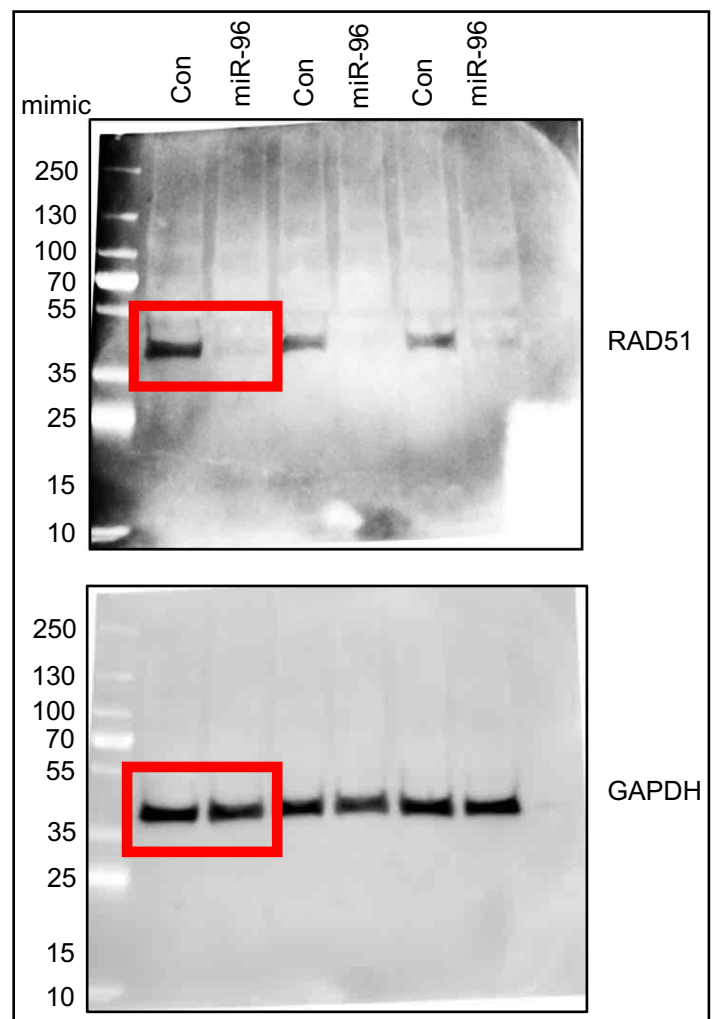

**Supplementary Fig. 13. Original immunoblots for Fig. 5.**

Figure 6A

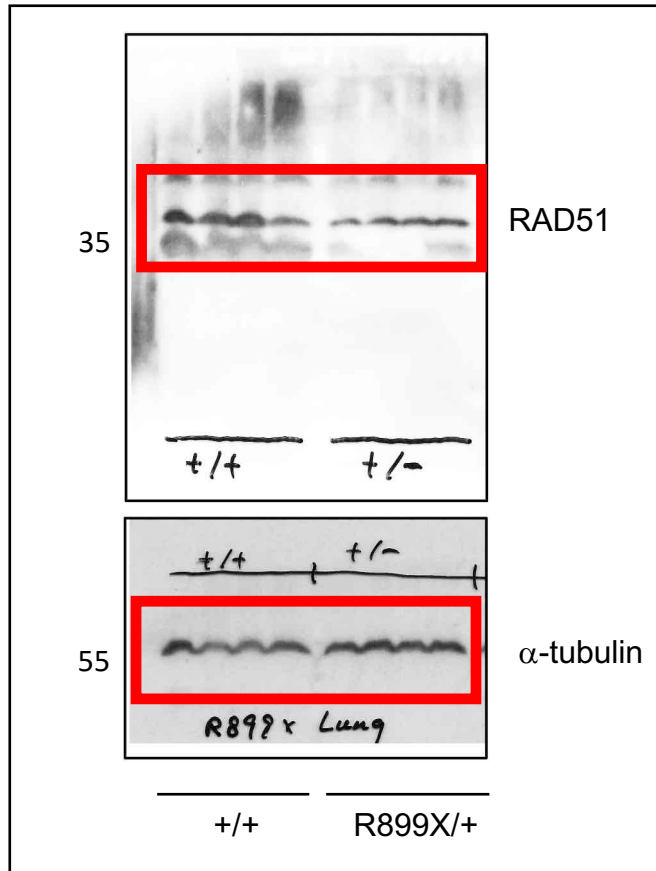

Figure 6B

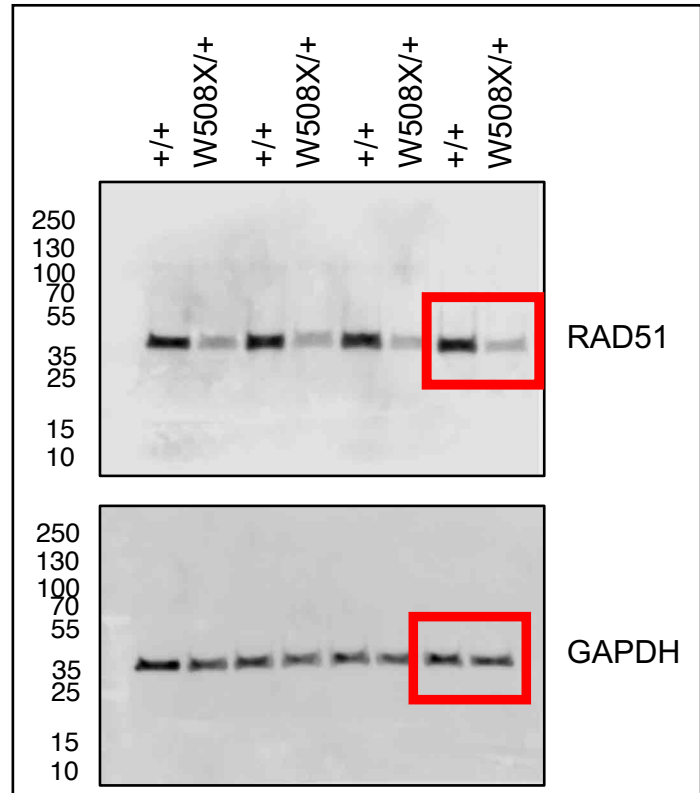

Supplementary Fig. 14. Original immunoblots for Fig. 6.

Supplementary Figure 1

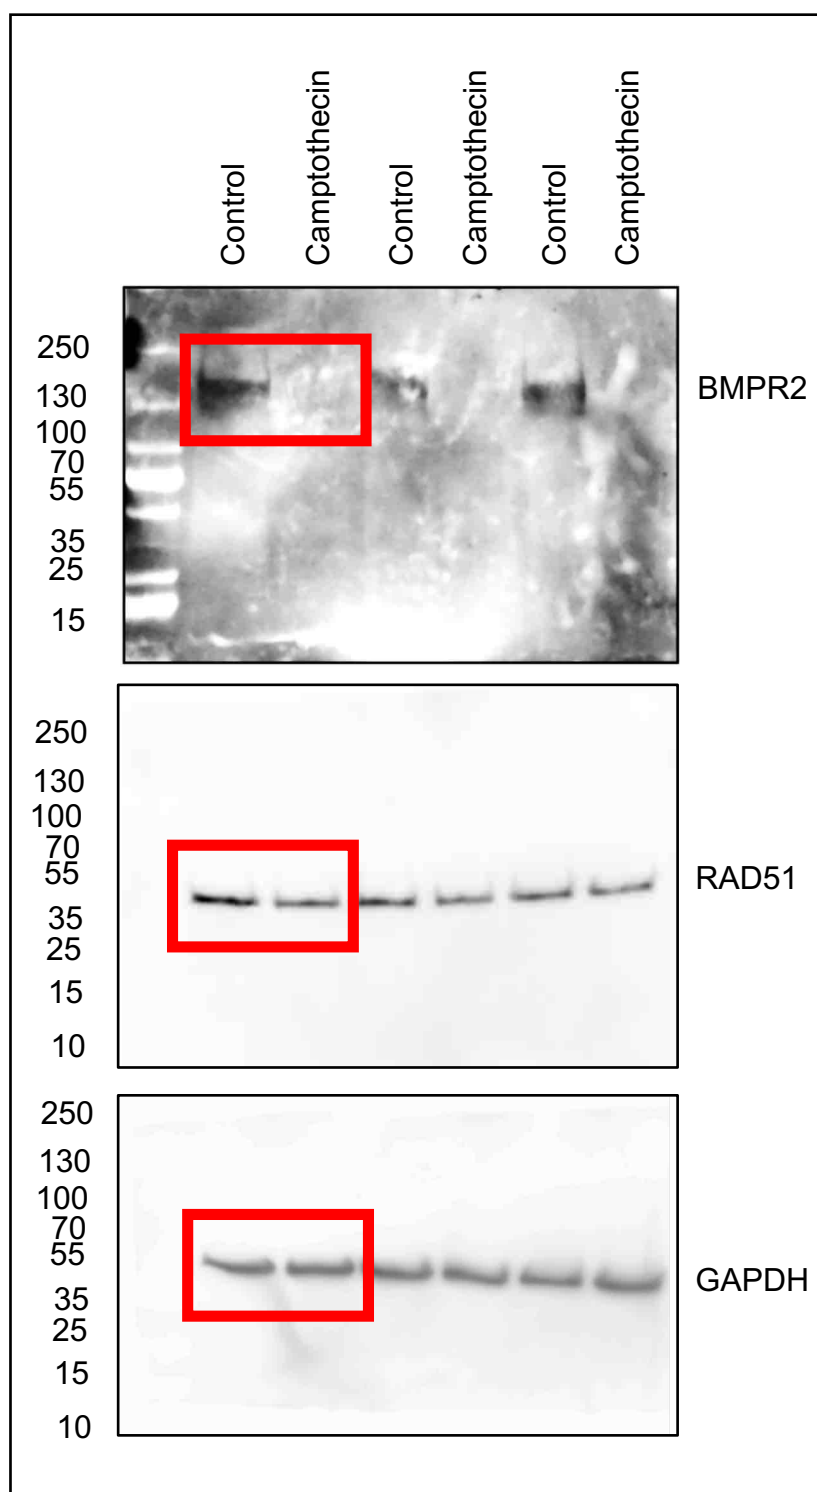

Supplementary Fig. 15. Original immunoblots for Supplementary Fig. 1.

Supplementary Figure 2B.

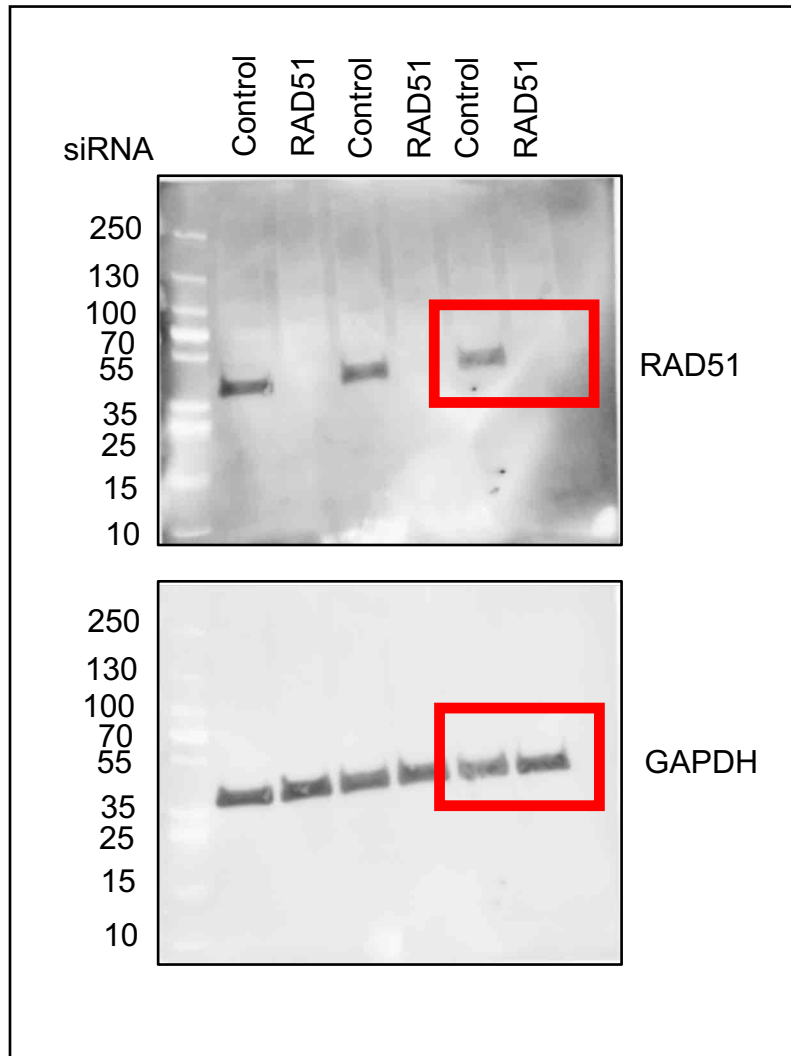

Supplementary Fig. 16. Original immunoblots for Supplementary Fig. 2.



**Supplementary Figure 3B**

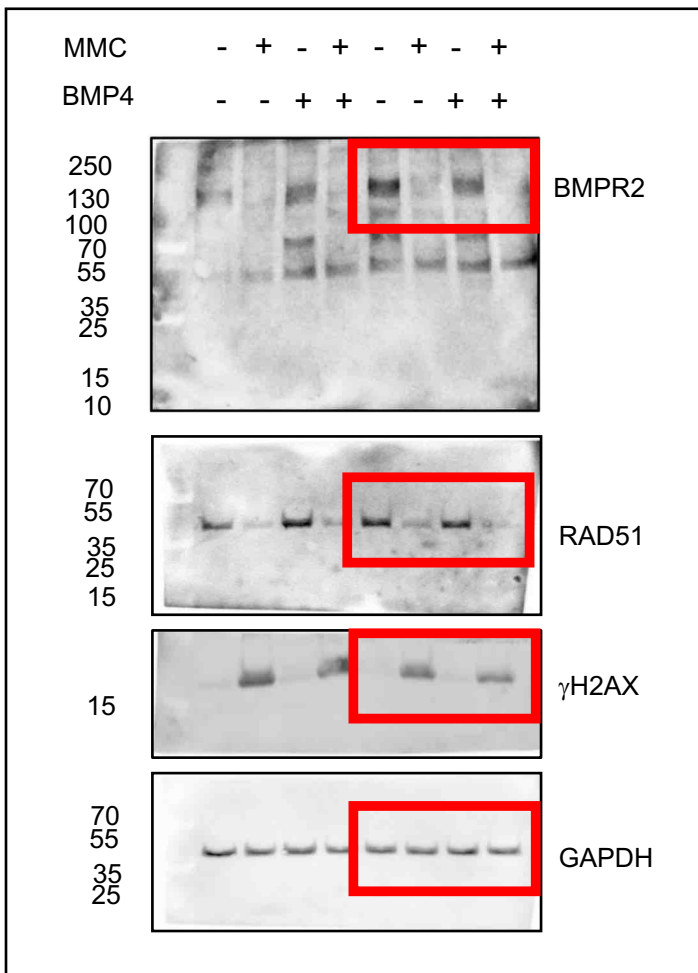

**Supplementary Figure 3C**

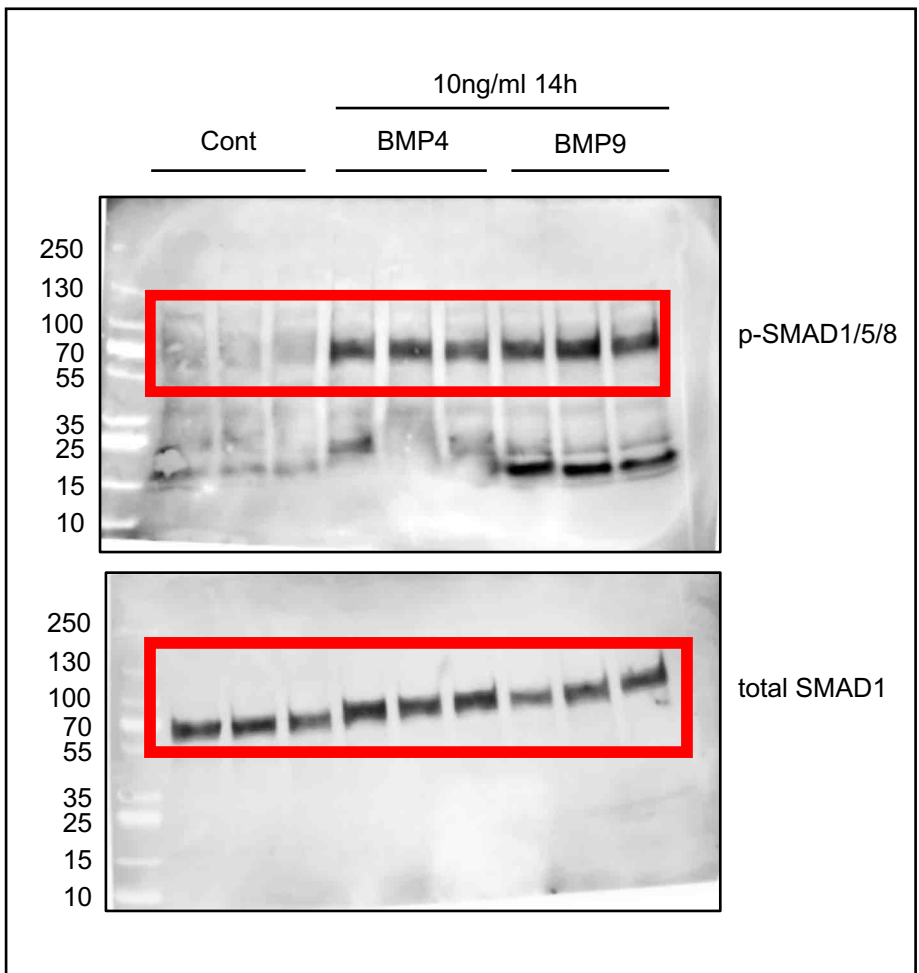

**Supplementary Fig. 17. Original immunoblots for Supplementary Fig. 3.**

Supplementary Figure 5A

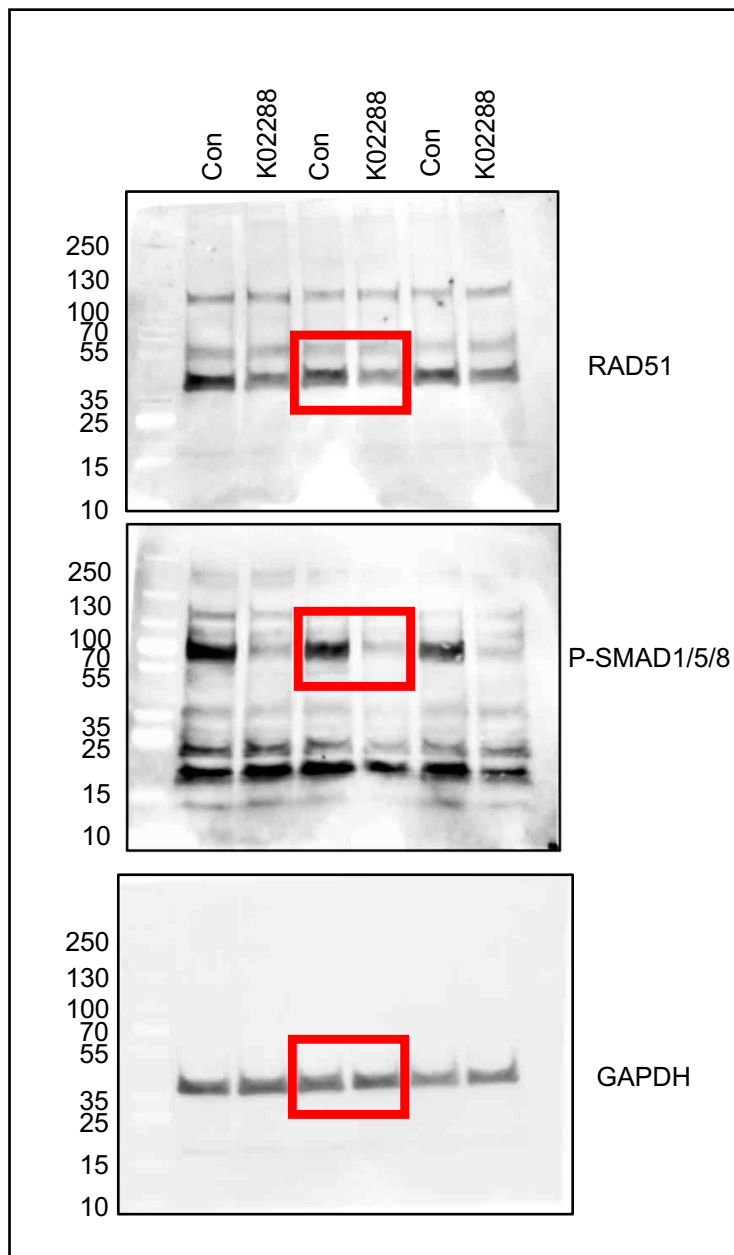

Supplementary Figure 5B

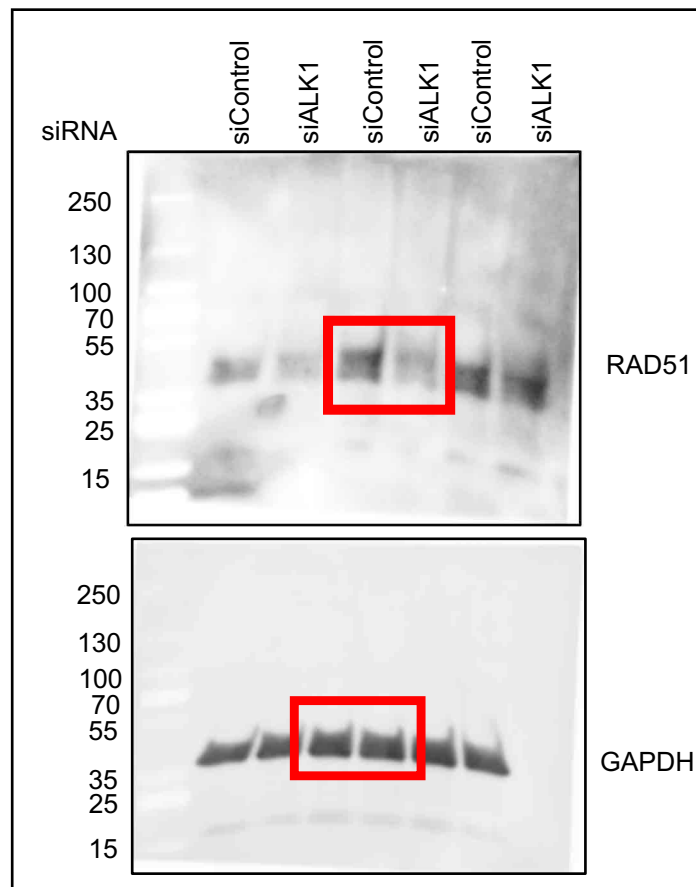

Supplementary Fig. 18. Original immunoblots for Supplementary Fig. 5.

Supplementary Figure 5C

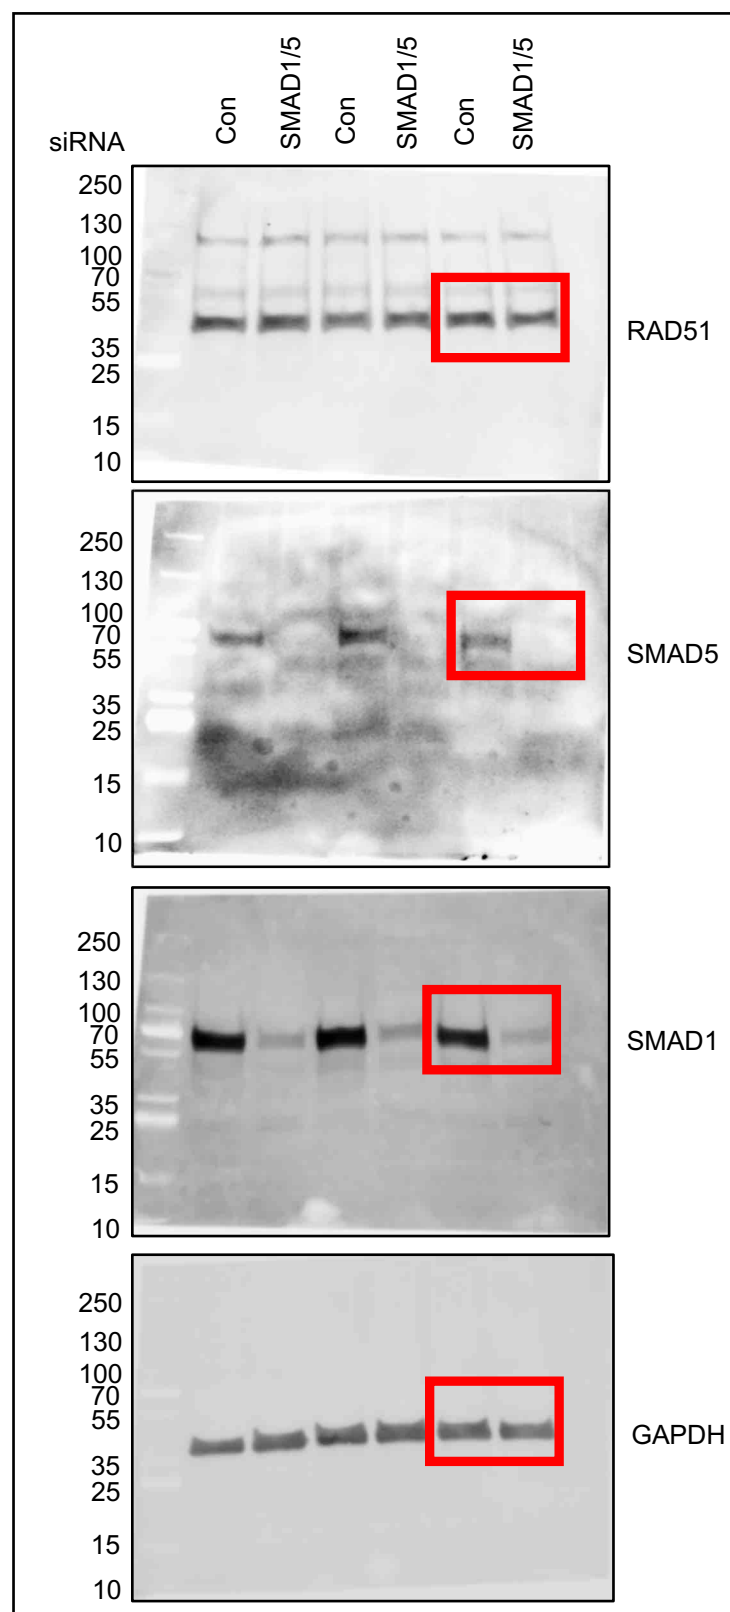

**Supplementary Figure 7A**

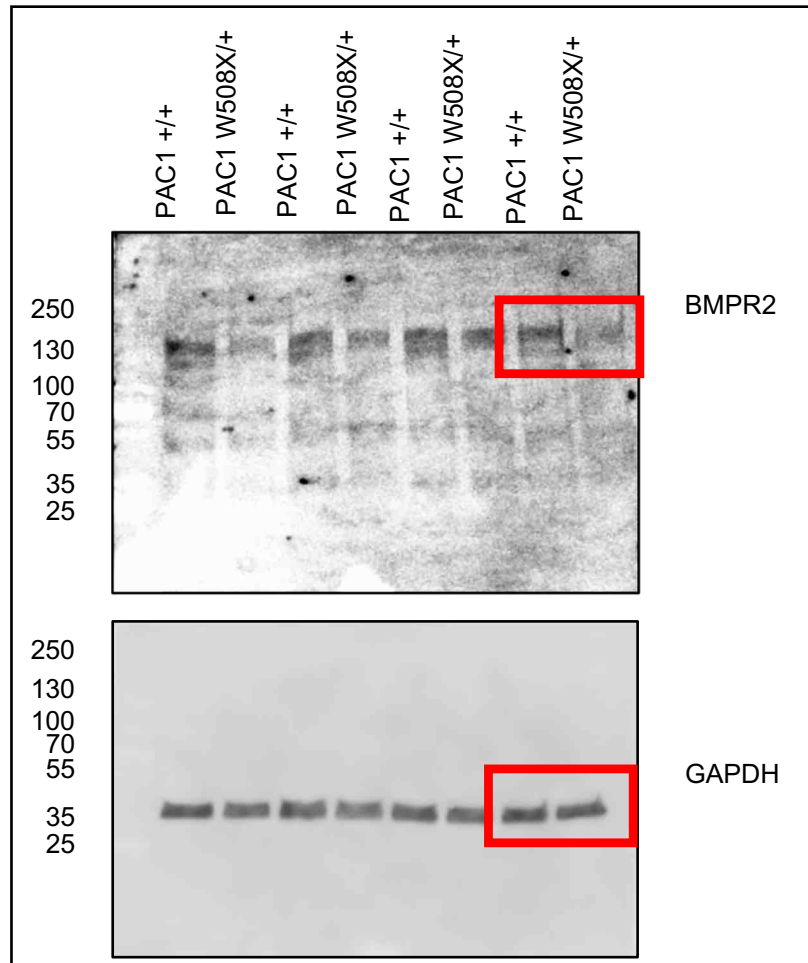

**Supplementary Fig. 19. Original immunoblots for Supplementary Fig. 7.**

Supplementary Figure 8A

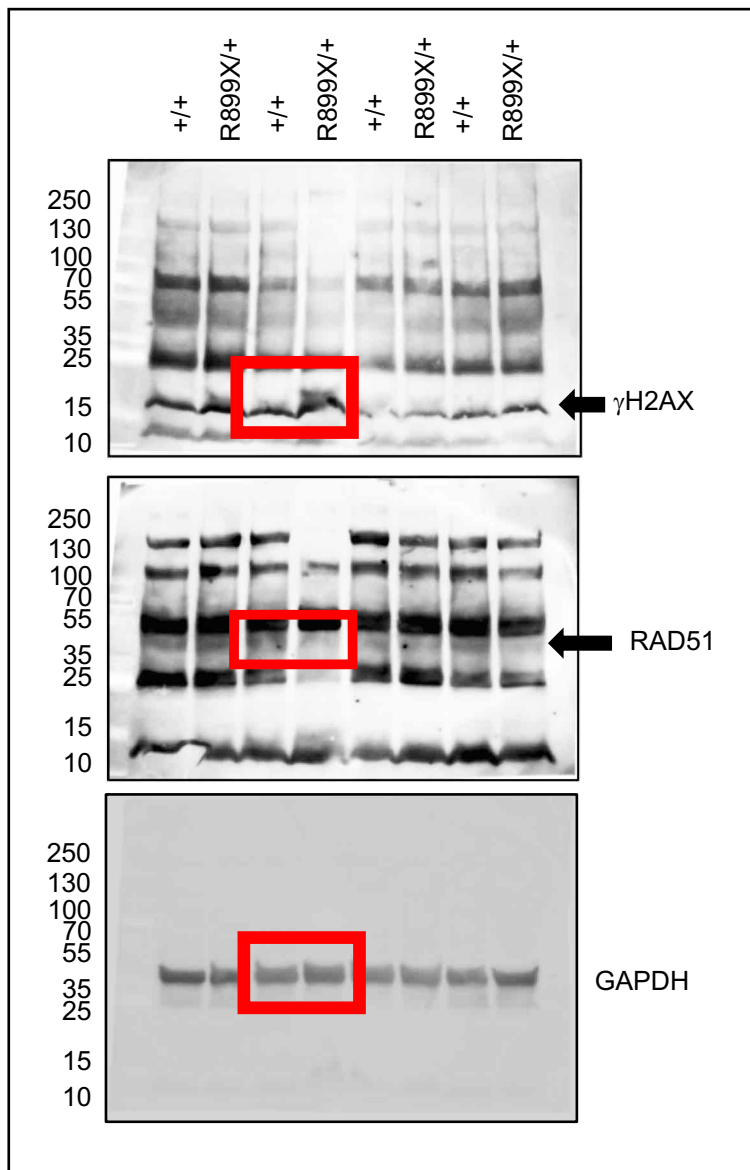

Supplementary Figure 8B

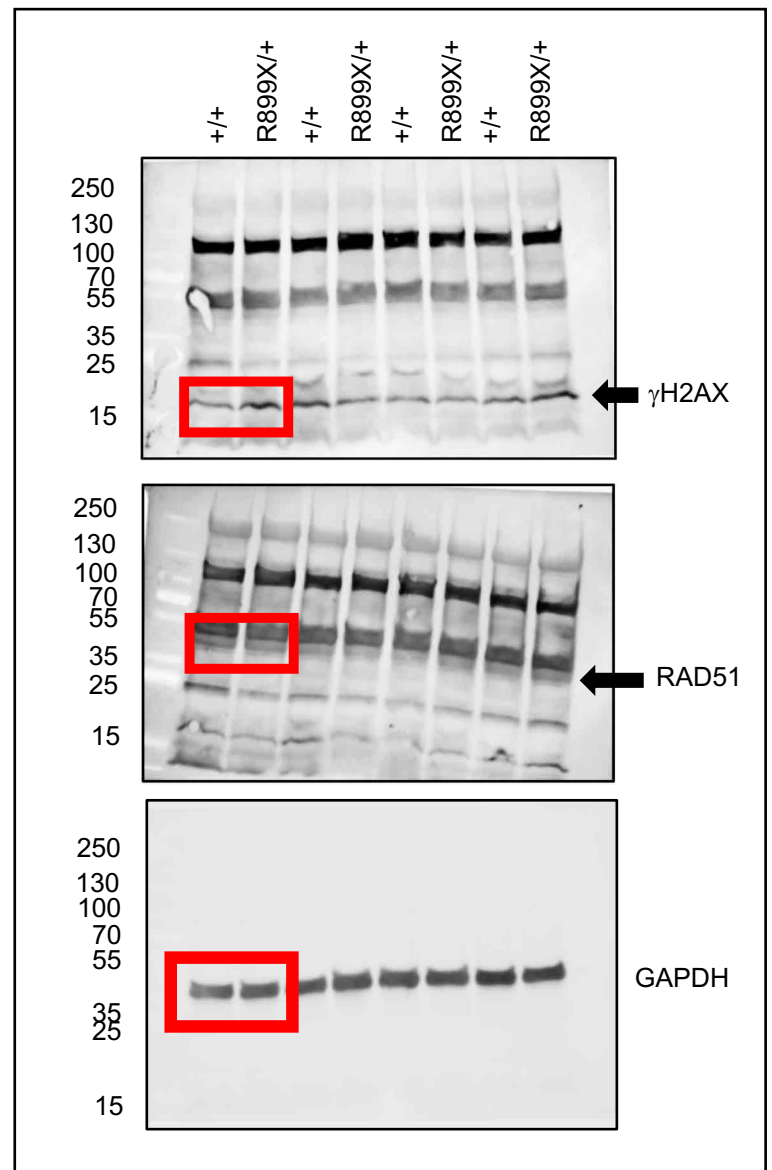

Supplementary Fig. 20. Original immunoblots for Supplementary Fig. 8.

**Supplementary Tables****Supplementary Table 1. Primers used in qPCR.**

| <b>Gene Symbol</b> | <b>Primer Sequence</b>                                                 |
|--------------------|------------------------------------------------------------------------|
| human GAPDH        | F: 5'-GTCAACGGATTTGGTCGTATTG-3'<br>R: 5'-TGGAAGATGGTGATGGGATTT-3'      |
| human BMPR2        | F: 5'-GGGTAAGCTCTTGCCGTCTTG-3'<br>R: 5'-CCCCTGGGCGCACCAGTCTAT-3'       |
| human BRCA1        | F: 5`-CAGTCGGGAAACAAGCATAGA-3`<br>R: 5`-AATACTGGAGCCCCTTCATTAG-3`      |
| human RAD51        | F: 5`-TGTTGTGACTGCCAGGATAAA-3`<br>R: 5`-GGTAGATGGTGAAGGGCTAATG-3`      |
| human p21          | F: 5`-GGAAGGGACACACAAGAAGAA-3`<br>R: 5`-TCCTTGTTCCGCTGCTAATC-3`        |
| human ID1          | F: 5'- GTTGGGAGACTCGCAGGTGT-3'<br>R: 5'- CCTGAACCTGCAACAGTTCG-3'       |
| human ID3          | F: 5'-GAAAGGTTGCCTGGGACACGCA-3'<br>R: 5'-GGCTTTTGTCTGCGCTGTTTTTGTTC-3' |
| human ALK-1        | F: 5'-GCAACCTGCAGTGTTGCATC-3'<br>R: 5'-CGGATCTGCTCGTCCAGCAC-3'         |
| rat beta-actin     | F: 5`-GATACTCCAGCACACTTAAC-3`<br>R: 5`-GAAGGGACGAGACTACAACCTTAC-3`     |
| rat RAD51          | F: 5`-GTGGAATTGAGACTGGGTCTATC-3`<br>R: 5`-CTGTCCCACACCTGTCATTT-3`      |

F=Forward R=Reverse
